# Supplementary material for: Tuning the gate-opening pressure and particle size distribution of the switchable metal–organic framework DUT-8(Ni) by controlled nucleation in a micromixer
Source: Royal Society of Chemistry journal article supplement (doi:10.1039/c7dt02809a), 2017-01-01
Supplement: c7dt02809a1.pdf [file c7dt02809a1.pdf]

Electronic supporting information

for paper

**Tuning the gate-opening pressure and particle size distribution of the switchable metal-organic framework DUT-8(Ni) by controlled nucleation in a micromixer**

H. Miura,<sup>a,b</sup> V. Bon,<sup>\*a</sup> I. Senkovska,<sup>a</sup> S. Ehrling,<sup>a</sup> S. Watanabe,<sup>c</sup> M. Ohba<sup>b</sup> and S. Kaskel<sup>a</sup>

**Table of content**

|                                                                     |    |
|---------------------------------------------------------------------|----|
| 1. Schemes and photos of the experimental setup                     | 2  |
| 2. Characterization of the micromixer by Villiermaux-Dushman method | 3  |
| 3. PXRD patterns                                                    | 4  |
| 4. Nitrogen physisorption isotherms                                 | 6  |
| 5. Scanning electron microscopy                                     | 8  |
| 6. DRIFT spectra                                                    | 10 |
| 7. TG curves                                                        | 13 |

## 1. Schemes and photos of the experimental setup.

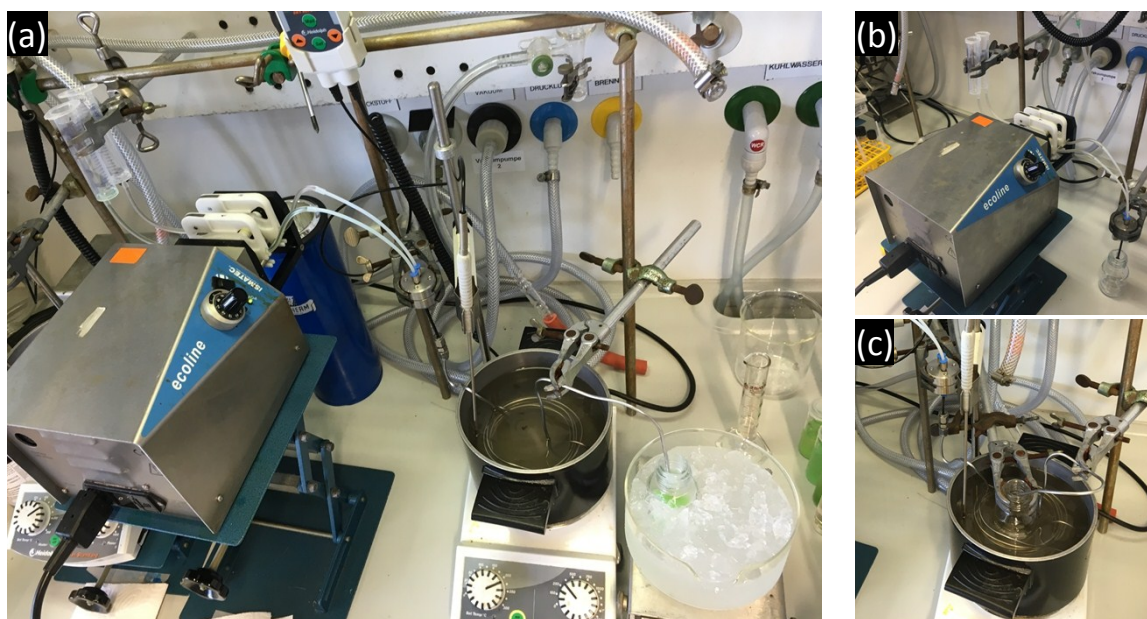

Figure S1. Photograph of experimental system using micromixer for the synthesis of samples: (a) **m1**, (b) **m2** and (c) **m3-m8**.

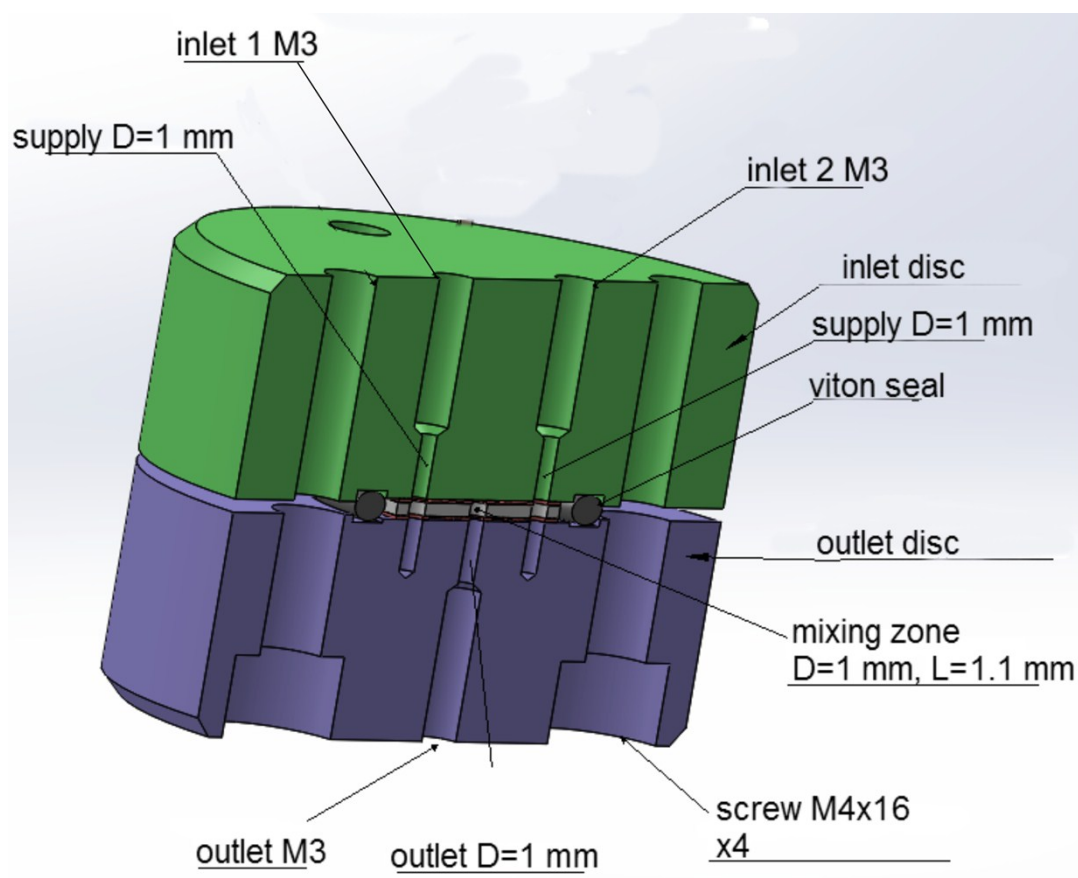

Figure S2. Schematic representation of the micromixer

## 2. Villiermaux-Dushman method

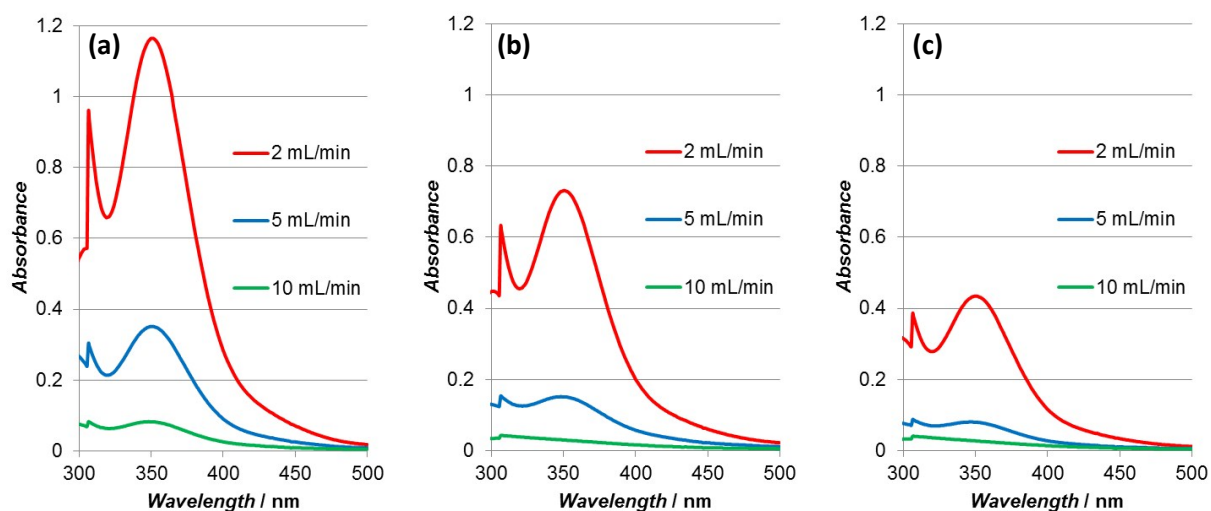

Figure S3. UV-Vis spectra for resulting solution of the (a) set 1, (b) set 2 and (c) set 3 by Villiermaux-Dushman reaction

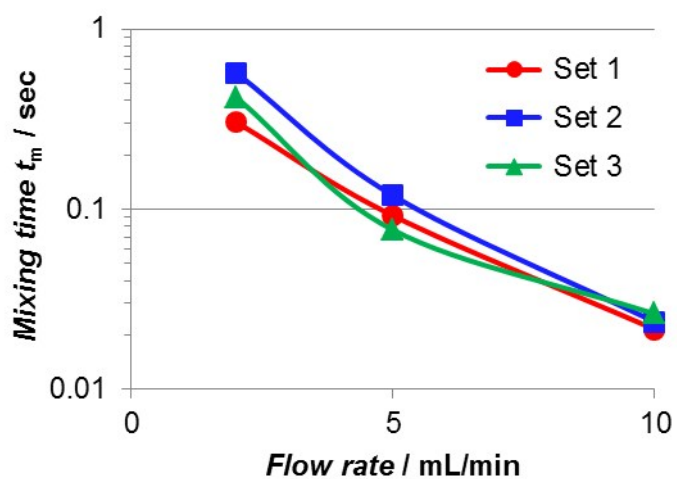

Figure S4. Dependence of the characteristic mixing time  $t_m$  on the flow rate for the micromixer.

**Table S1.** Concentration sets for Villiermaux-Dushman reaction

| C       |                   |       |                     |        |                                   |
|---------|-------------------|-------|---------------------|--------|-----------------------------------|
| (mol/L) | [H <sup>+</sup> ] | [KI]  | [KIO <sub>3</sub> ] | [NaOH] | [H <sub>3</sub> BO <sub>3</sub> ] |
| Set 1   | 0.02              | 0.032 | 0.006               | 0.09   | 0.09                              |
| Set 2   | 0.015             | 0.016 | 0.003               | 0.045  | 0.045                             |
| Set 3   | 0.015             | 0.032 | 0.006               | 0.09   | 0.09                              |

### 3. PXRD patterns

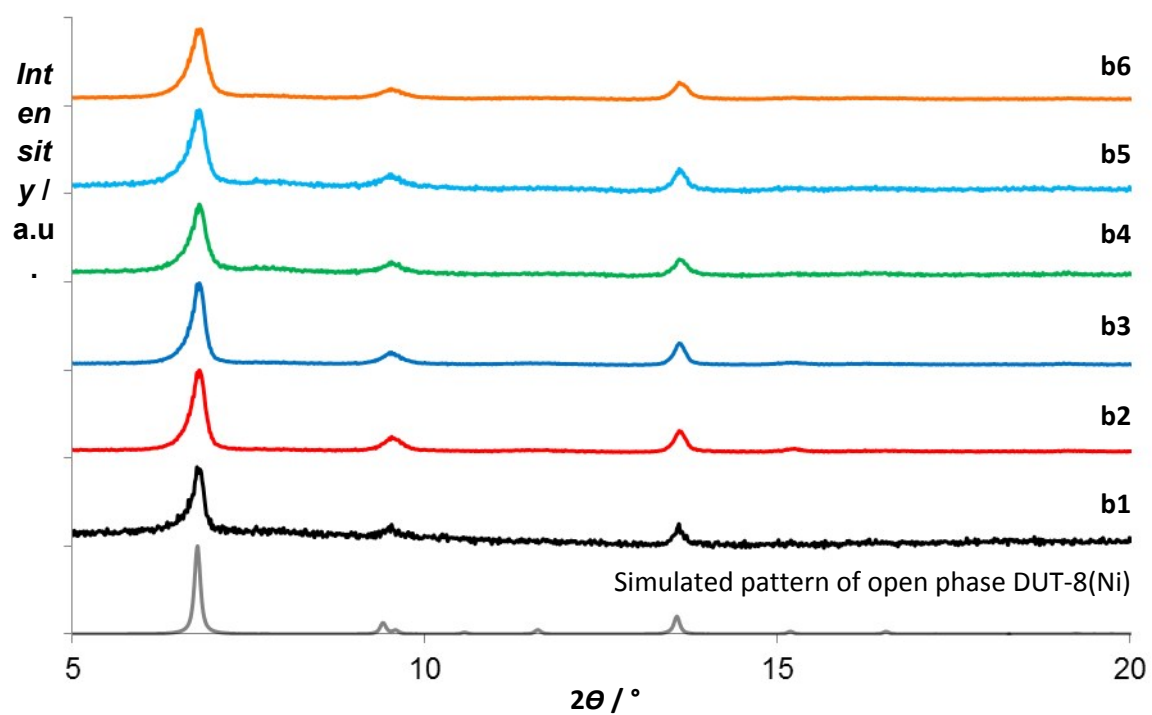

Figure S5. PXRD patterns for activated DUT-8(Ni) samples, synthesized in batch using different ratio of reactants and the order of mixing (**b1**, **b2**, **b3**, **b4**, **b5** and **b6**).

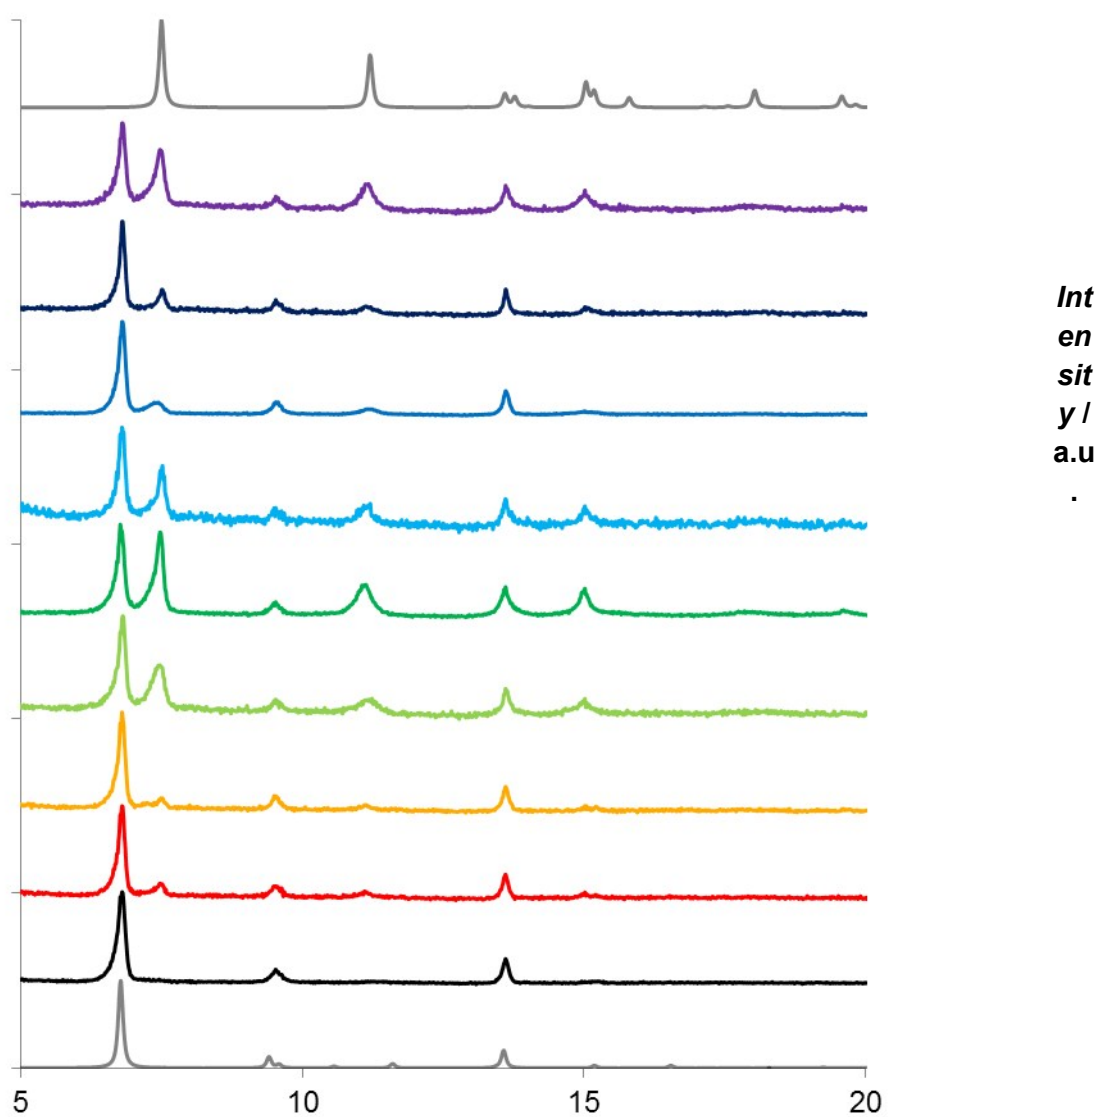

Figure S6. PXRD patterns for activated DUT-8(Ni) samples, synthesized by batch synthesis procedures at different temperatures (**b7**, **b8**, **b9**, **b10**, **b11**, **b12**, **b13**, **b14** and **b15**).

#### 4. Nitrogen physisorption isotherms

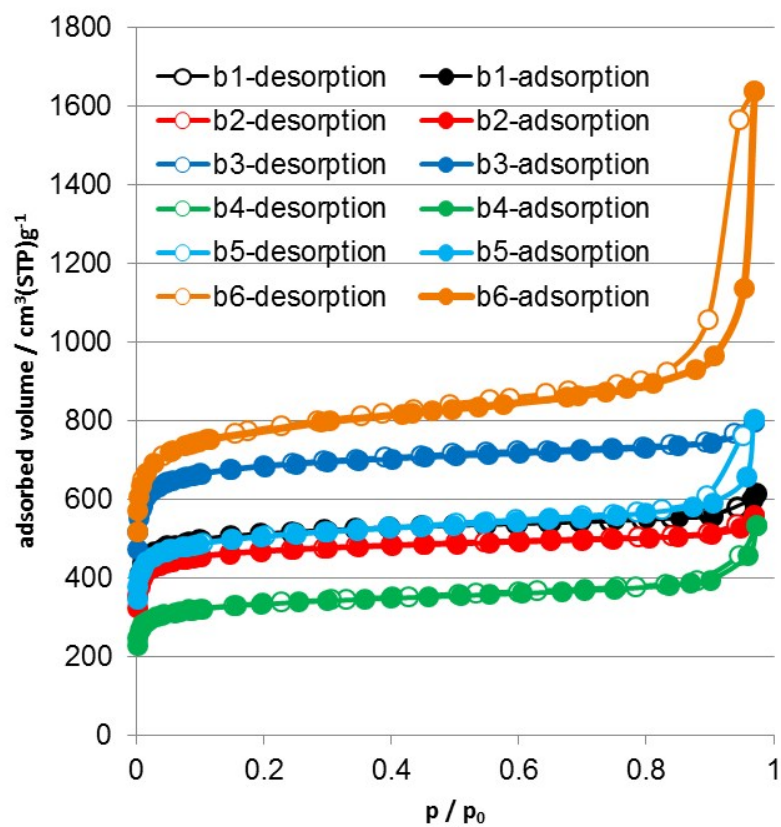

Figure S7. Nitrogen physisorption isotherms for samples **b1** – **b6** measured at 77 K.

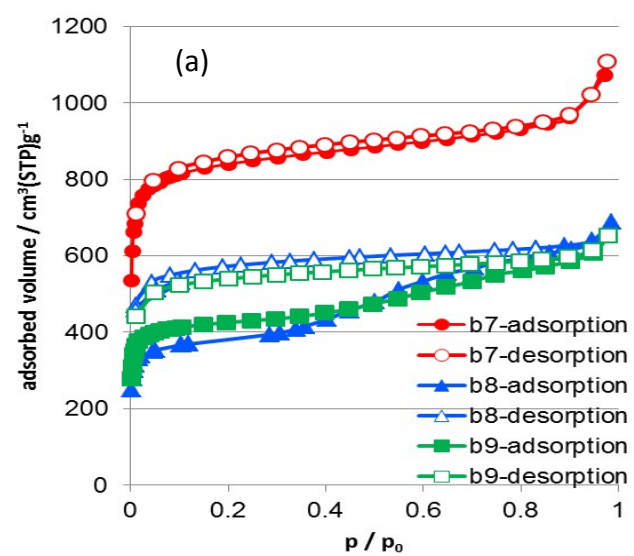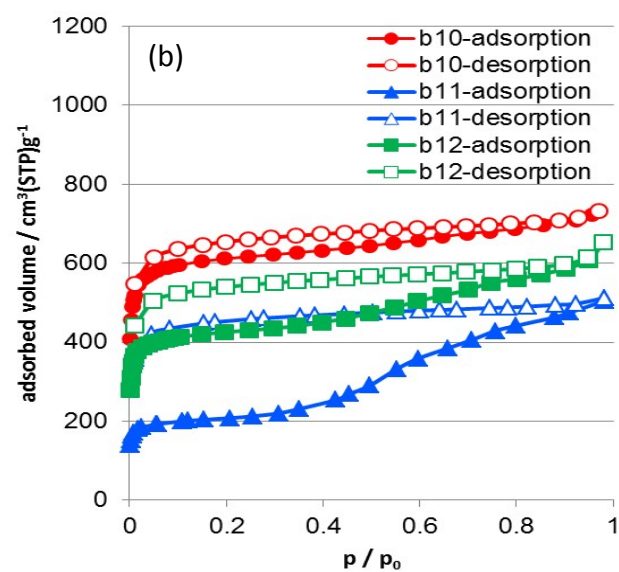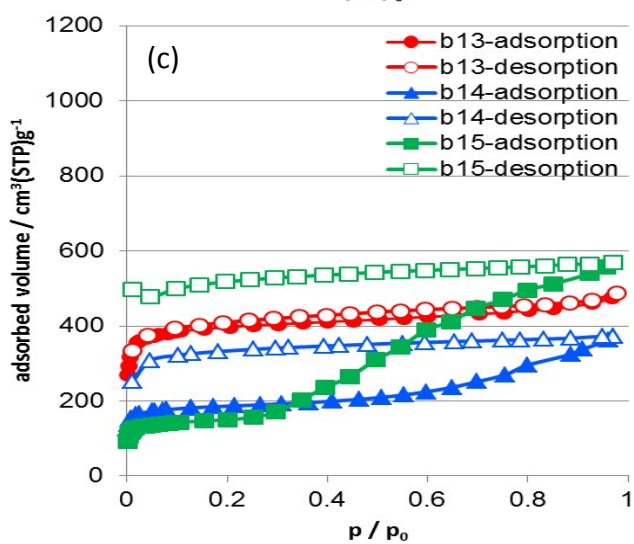

Figure S8. Nitrogen physisorption isotherms for (a) **b7 – b9**, (b) **b10 – b12** and (a) **b13 – b15** measured at 77 K.



## 5. Scanning electron microscopy

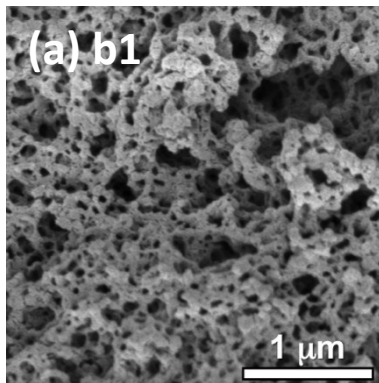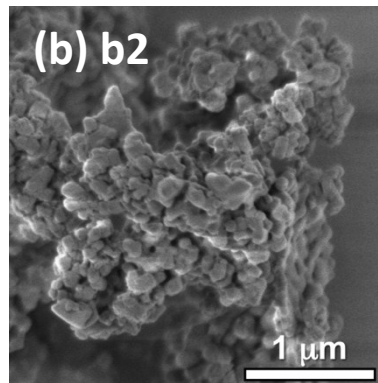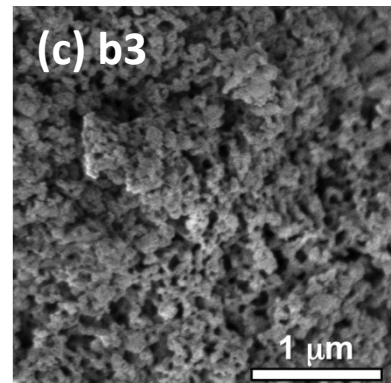

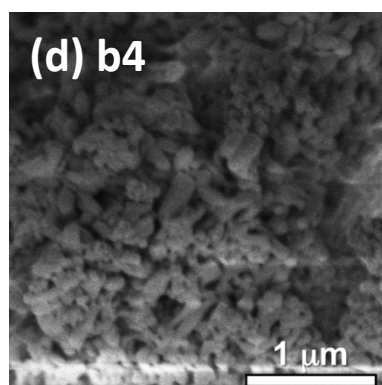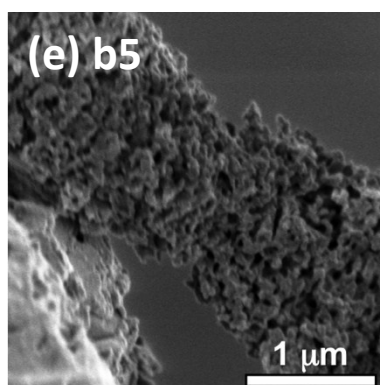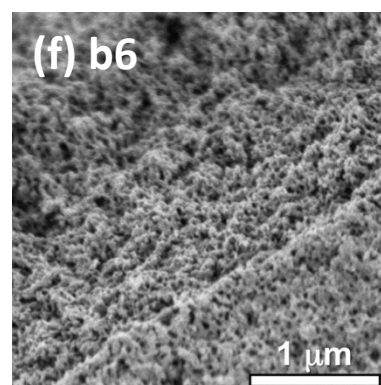

Figure S9. SEM images for samples b1-b6.



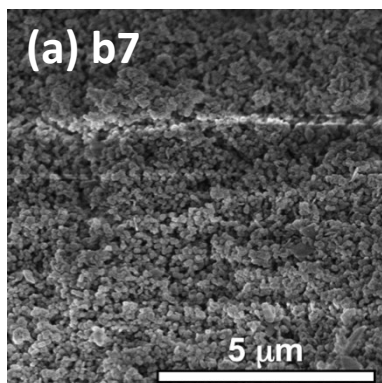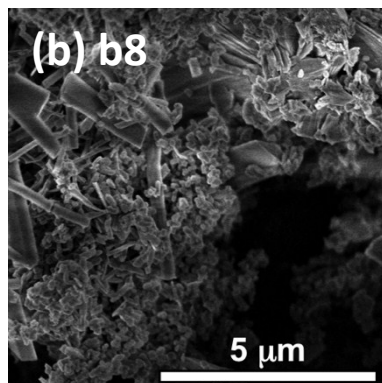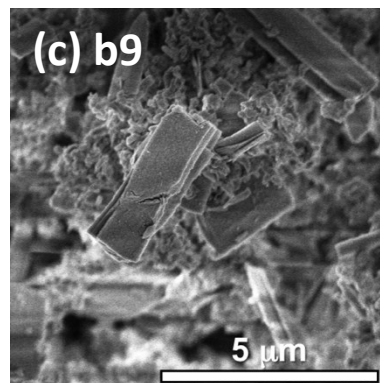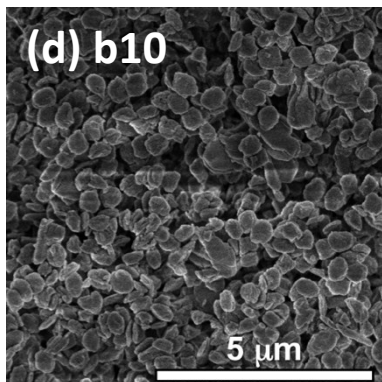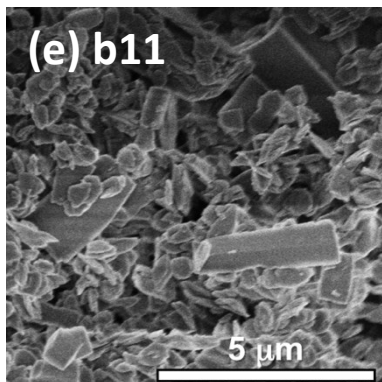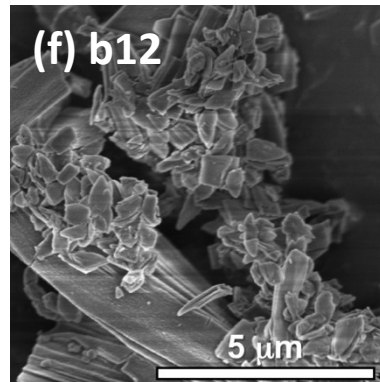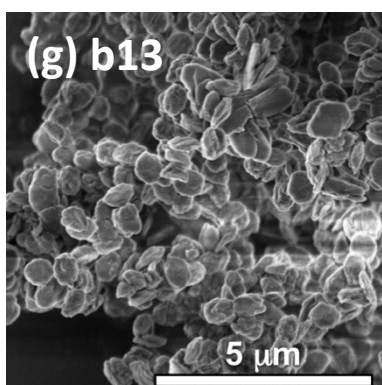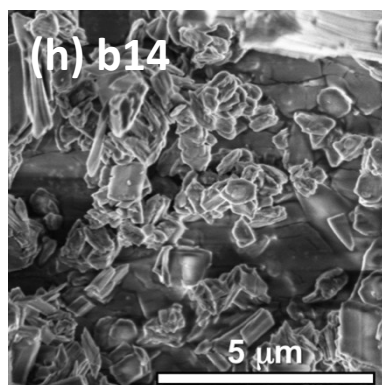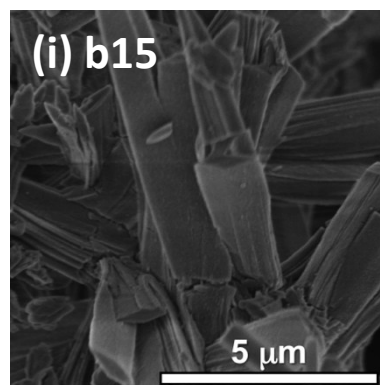

Figure S10. SEM images for samples b7-b15.

## 6. DRIFT spectra

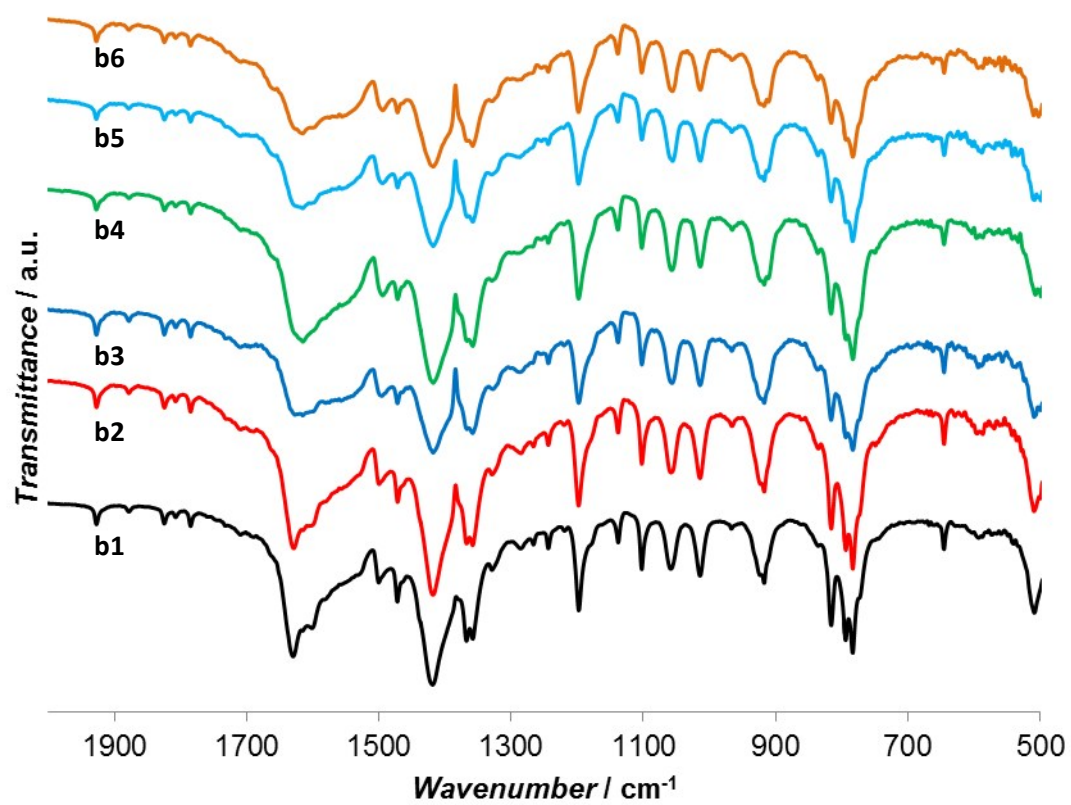

Figure S11. DRIFT spectra for samples **b1**- **b6**.

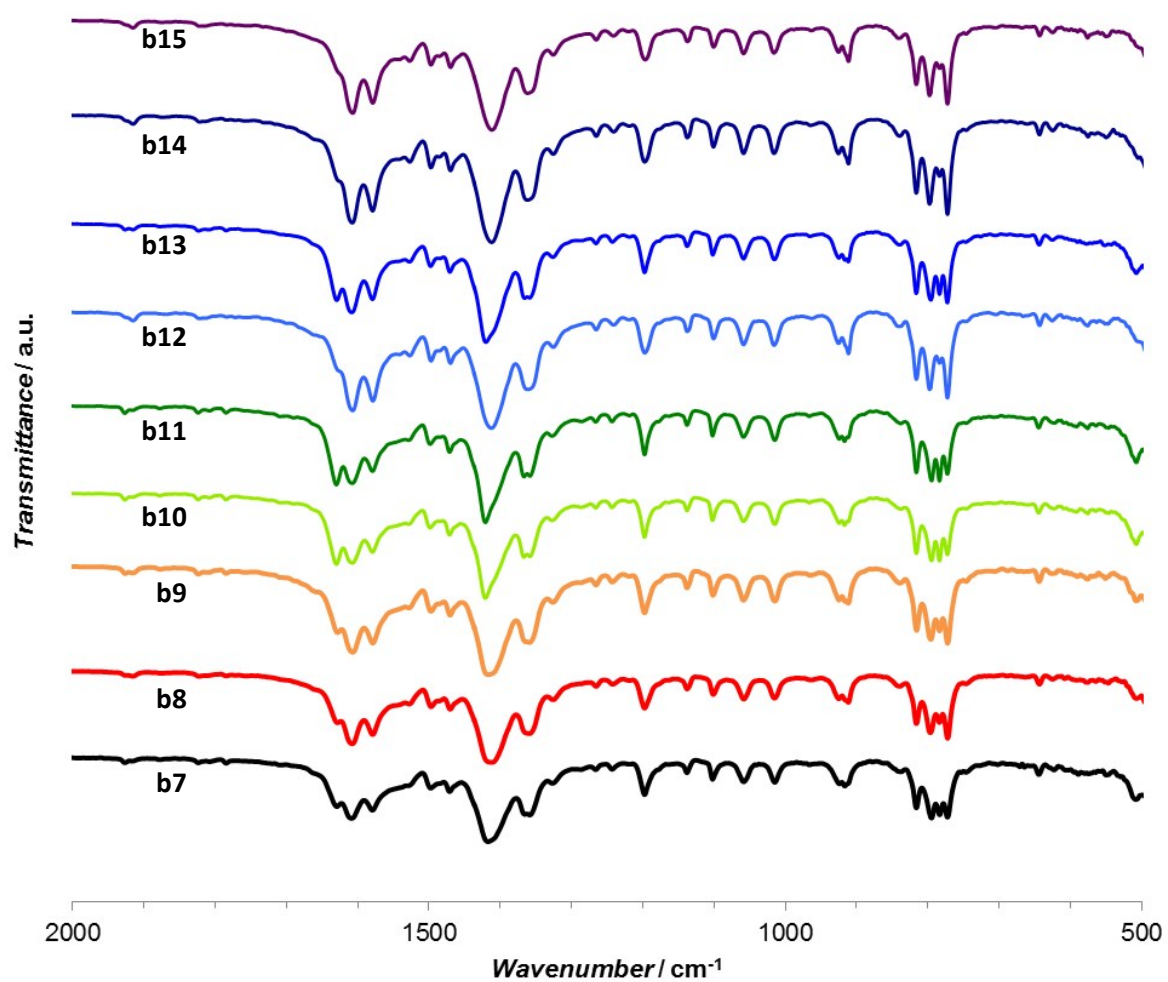

Figure S12. DRIFT spectra for samples **b7- b15**.



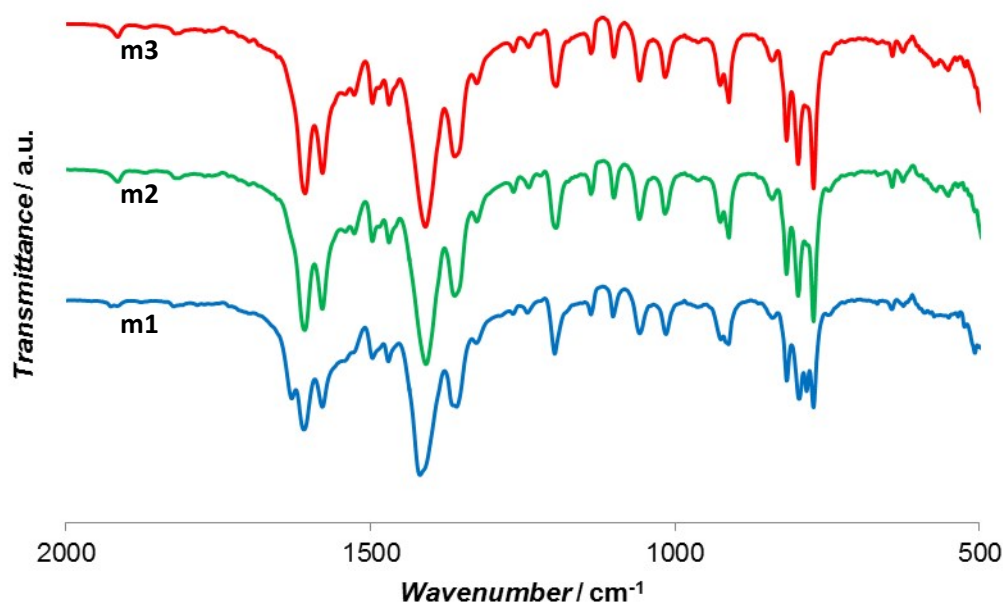

Figure S13. DRIFT spectra for samples **m1**, **m2** and **m3**.

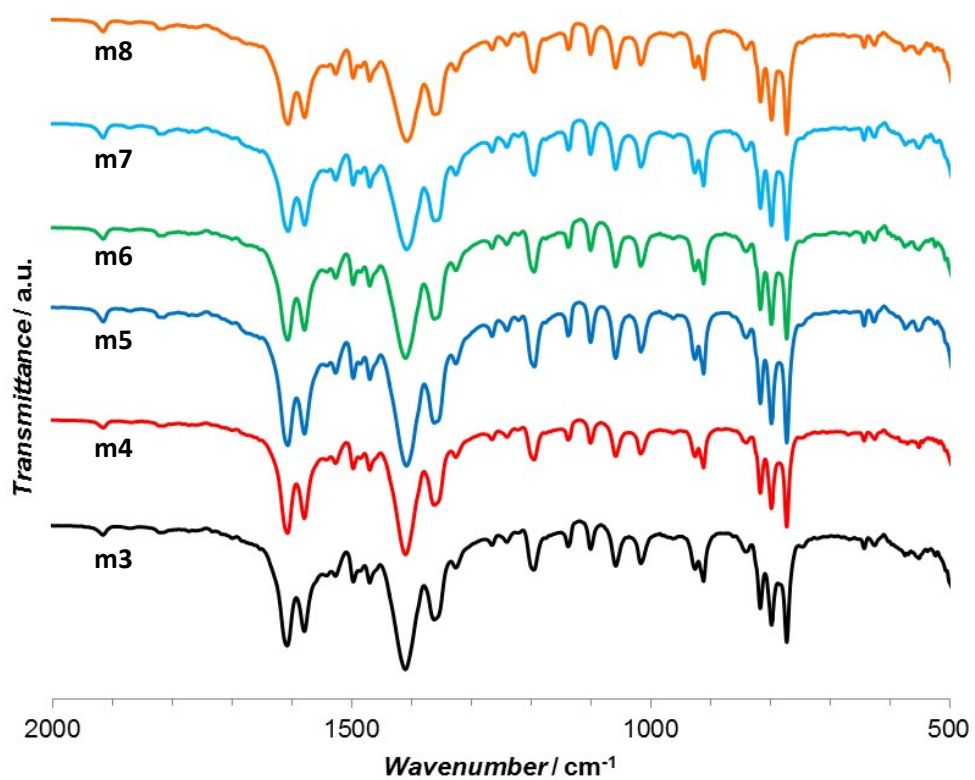

Figure S14. DRIFT spectra for samples **m3- m8**.

7. TG curves

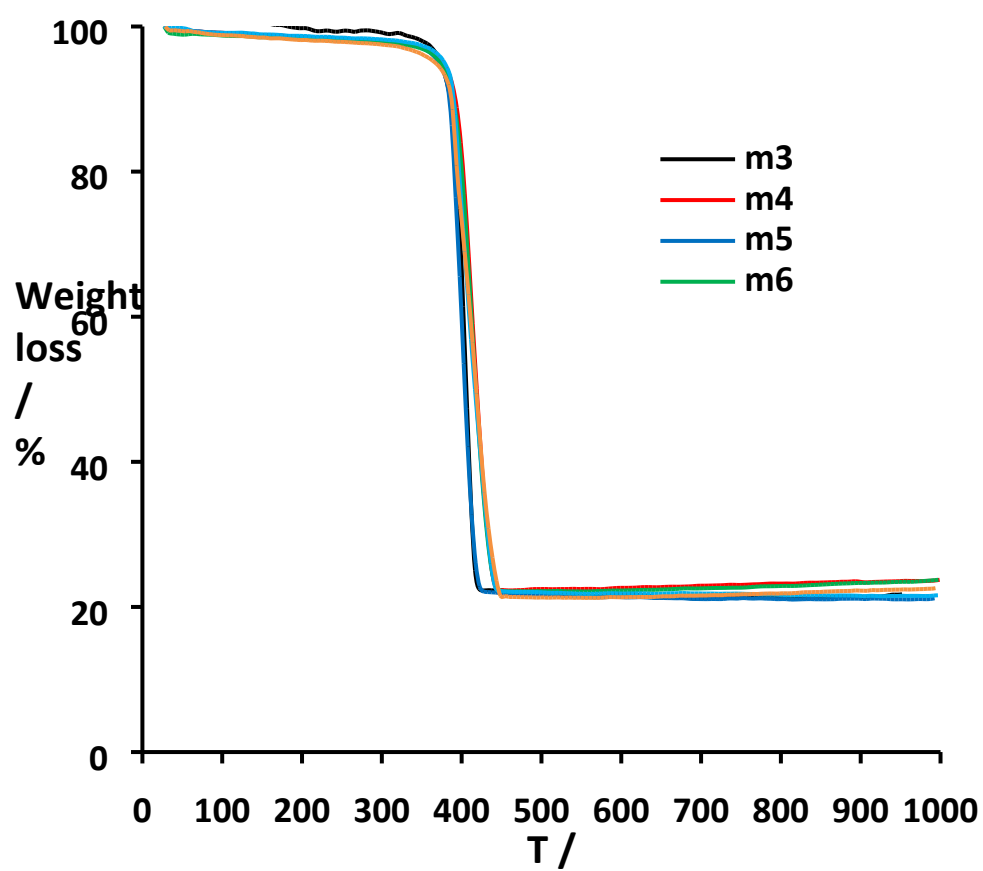

Figure S15. TG curves for samples m3-m8.
